# Supplementary material for: Acquired Deficiency of A20 Results in Rapid Apoptosis, Systemic Inflammation, and Abnormal Hematopoietic Stem Cell Function
Source: PubMed Central journal article supplement (PMC3909109; doi:10.1371/journal.pone.0087425), 2014-01-31
Supplement: pone.0087425.s001.pdf [file pone.0087425.s001.pdf]

**(A)**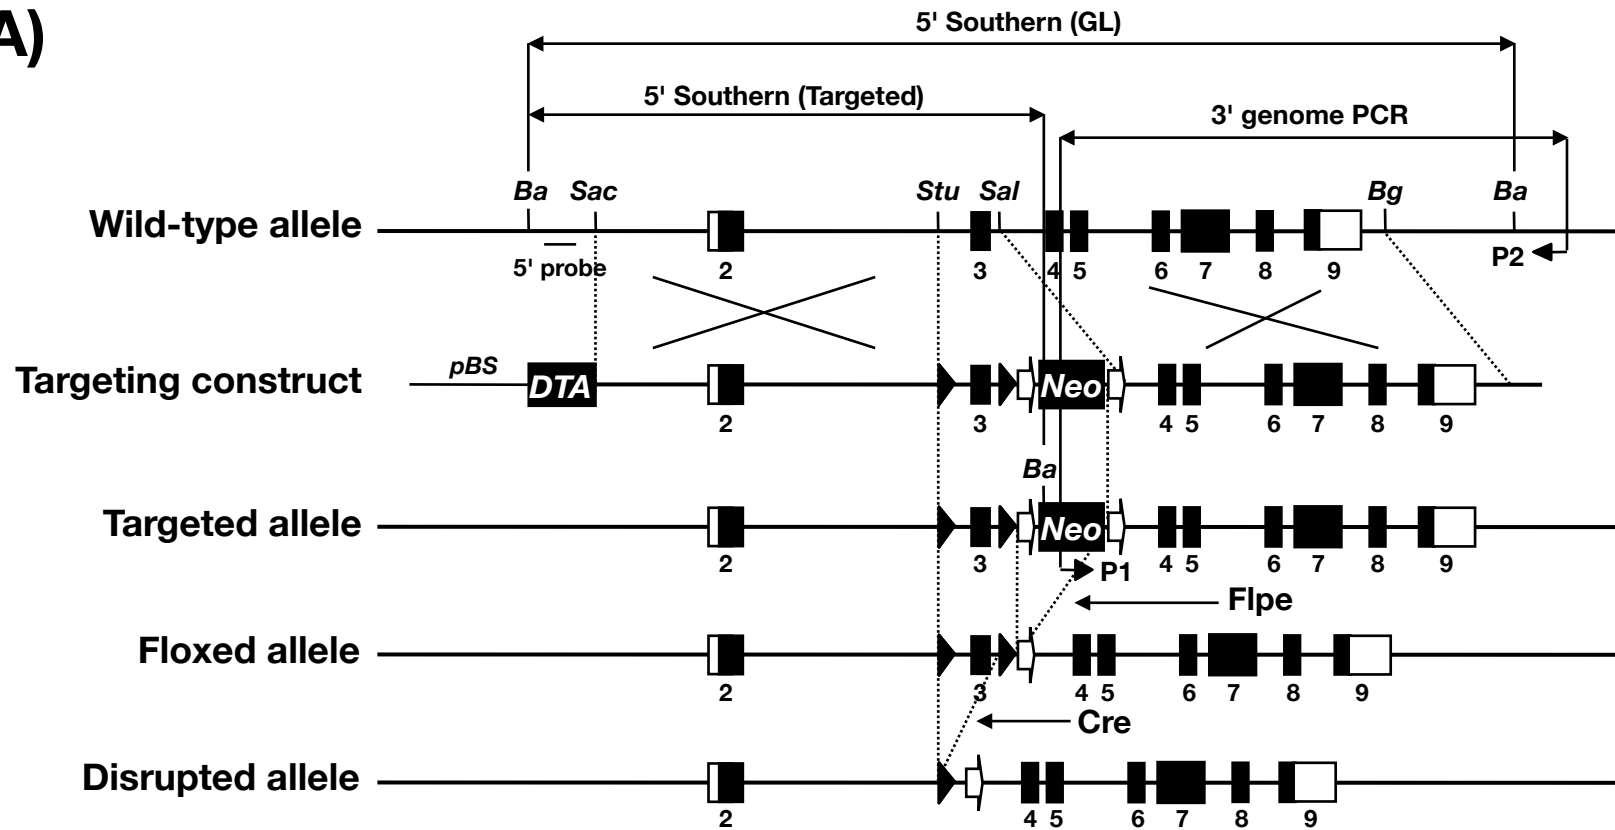**(B)**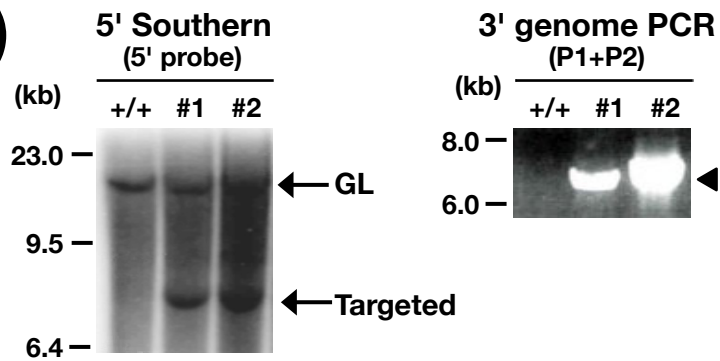**(C)**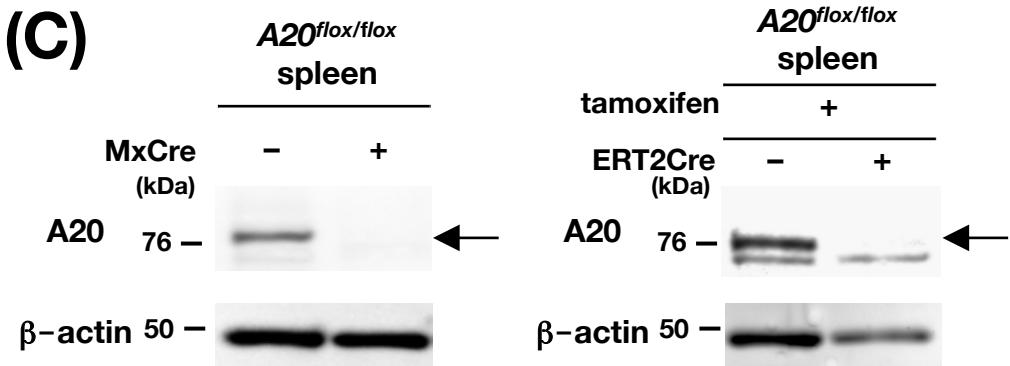Figure S1. Nagamachi A., *et al.*
